# Supplementary material
Source: PubMed Central journal article supplement (PMC3034841)

### Quantitative real-time polymerase chain reaction of PDGF-R alpha mRNA expression in B16F10 mouse melanoma cell line

PDGF-R alpha mRNA expression was evaluated by quantitative real-time polymerase chain reaction (qRT-PCR). Total RNA (2  $\mu$ g/sample) extracted from HUVEC cells, murine B16F10 and primary mouse fibroblasts was prepared using TRIZOL (Invitrogen) according to the manufacturer's instructions. mRNAs levels were analyzed using the SYBR-GREEN qPCR method Qiagen. qRT-PCR was performed on cDNAs obtained following retrotranscription of mRNAs.

cDNAs were used as templates for Taqman qRT-PCR with ABI Assays-on Demand on an ABI Prism 7000 sequence detection system (Applied Biosystem). Primers for murine and human PDGFR-alpha were designed with the Primer Express software version 2.0. Glyceraldehyde-3-phosphate dehydrogenase (GAPDH) was amplified on the same plate for each sample for normalization purposes. The experiments were performed in triplicate; data are reported as average and S.D.

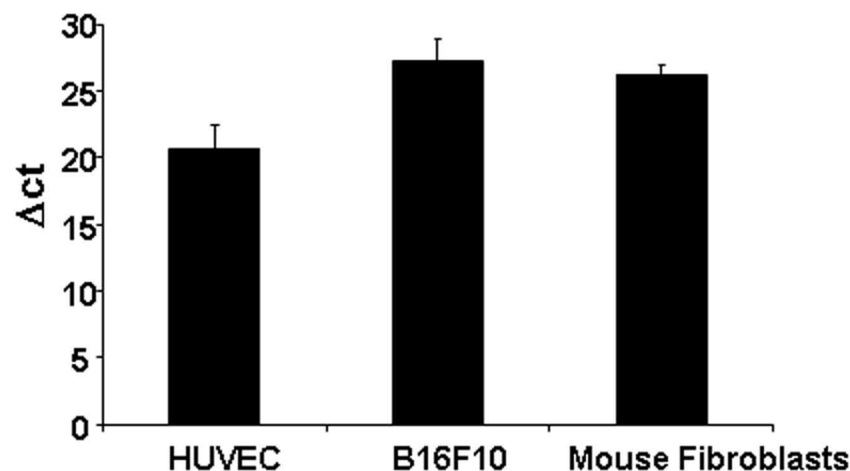

Supplement: mt2010211x1.pdf [file mt2010211x1.pdf]
