# Supplementary material
Source: PubMed Central journal article supplement (PMC3034841)
Supplement: mt2010211x2.pdf [file mt2010211x2.pdf]

**Aguzzi et al. Not shown**

**Table S1 . Acute toxicity studies: haematological analysis in healthy mice upon FREG treatment**

| <b>Parameter</b>                               | <b>Un-treated control</b> | <b>Treated with 30 mg/Kg</b> |
|------------------------------------------------|---------------------------|------------------------------|
| Red Blood Cells 10 <sup>6</sup> /mcL           | 9.16                      | 9.17                         |
| Hemoglobin g/dL                                | 13.4                      | 13.6                         |
| Hematocrit %                                   | 46.0                      | 46.1                         |
| Mean Corpuscular volume fL                     | 50.2                      | 50.3                         |
| Mean Corpuscular hemoglobin pg                 | 14.6                      | 14.8                         |
| Mean Corpuscular HGB Conc. g/dL                | 29.1                      | 29.5                         |
| Red cell distribution width %                  | 11.7                      | 12.0                         |
| Hemoglobin distribution width g/dL             | 1.53                      | 1.53                         |
| Mean Platelet Volume fL                        | 5.5                       | 5.3                          |
| Platelet Distribution width %                  | 46.4                      | 46.5                         |
| White blood cells 10 <sup>3</sup> /mcL         | 3.62                      | 5.51                         |
| Monocytes ABS 10 <sup>3</sup> /mcL             | 0.05                      | 0.06                         |
| Eosinophils ABS 10 <sup>3</sup> /mcL           | 0.08                      | 0.11                         |
| Basophils ABS 10 <sup>3</sup> /mcL             | 0.00                      | 0.00                         |
| Large Unstained cells ABS 10 <sup>3</sup> /mcL | 0.02                      | 0.04                         |
| Monocytes %                                    | 1.4                       | 1.2                          |
| Eosinophils %                                  | 2.2                       | 1.9                          |
| Basophils %                                    | 0.1                       | 0.1                          |
| Large Unstained Cells %                        | 0.5                       | 0.7                          |
