# Supplementary material
Source: PubMed Central journal article supplement (PMC3034841)
Supplement: mt2010211x3.pdf [file mt2010211x3.pdf]

**Aguzzi et al. Not shown**

**Table S2. Acute toxicity studies: clinical-chemistry analysis in healthy mice upon FREG treatment**

| <b>Parameter</b>      | <b>Un-treated control</b> | <b>Treated with 30 mg/Kg</b> |
|-----------------------|---------------------------|------------------------------|
| Urea mg/dL            | 61                        | 49                           |
| Creatinine mg/dL      | 0.59                      | 0.62                         |
| Total Bilirubin mg/dL | 0.12                      | 0.10                         |
| Total Protein mg/dL   | 5.7                       | 5.3                          |
| Albumin g/dL          | 2.89                      | 2.74                         |
| Globulin g/dL         | 2.8                       | 2.6                          |
| Glucose mg/dL         | 266                       | 245                          |
| Albumin/Globulin      | 1.0                       | 1.1                          |
